# Supplementary material for: Changing Decisions: The Interaction between Framing and Decoy Effects
Source: MDPI journal article supplement (doi:10.3390/bs13090755), 2023-09-12
Supplement: s1 [file s1]

## Changing decisions: the interaction between Framing and Decoy effects

### Supplementary Materials

Table S1. Chi-square analysis for males and females.

| Gender | Condition                  | Risk-averse<br>choice | Risk-seeking<br>choice | $\chi^2$ | p     |
|--------|----------------------------|-----------------------|------------------------|----------|-------|
| Male   | Original positive          | 64.20%                | 35.80%                 | 39.620   | <.001 |
|        | Congruent decoy positive   | 82.80%                | 17.20%                 | 205.270  | <.001 |
|        | Incongruent decoy positive | 53.20%                | 46.80%                 | 1.765    | .18   |
|        | Original negative          | 26.40%                | 73.60%                 | 109.387  | <.001 |
|        | Congruent decoy negative   | 24.10%                | 75.90%                 | 115.648  | <.001 |
|        | Incongruent decoy negative | 41.60%                | 58.40%                 | 13.406   | <.001 |
| Female | Original positive          | 72.3%                 | 27.7%                  | 276.692  | <.001 |
|        | Congruent decoy positive   | 78.1%                 | 21.9%                  | 429.864  | <.001 |
|        | Incongruent decoy positive | 54.5%                 | 45.5%                  | 9.744    | <.001 |
|        | Original negative          | 27.6%                 | 72.4%                  | 279.179  | <.001 |
|        | Congruent decoy negative   | 24.0%                 | 76.0%                  | 329.077  | <.001 |
|        | Incongruent decoy negative | 49.9%                 | 50.1%                  | .005     | .94   |

Table S2. Chi-square analysis for each scenario included in the study.

| Scenario      | Condition                  | Risk-<br>averse<br>choice | Risk-<br>seeking<br>choice | $\chi^2$ | p     |
|---------------|----------------------------|---------------------------|----------------------------|----------|-------|
| Crew          | Original positive          | 69.4%                     | 30.6%                      | 48.024   | <.001 |
|               | Congruent decoy positive   | 75.2%                     | 24.8%                      | 77.475   | <.001 |
|               | Incongruent decoy positive | 53.8%                     | 46.2%                      | 1.496    | .220  |
|               | Original negative          | 26.9%                     | 73.1%                      | 68.089   | <.001 |
|               | Congruent decoy negative   | 22.7%                     | 77.3%                      | 83.771   | <.001 |
|               | Incongruent decoy negative | 43.6%                     | 56.4%                      | 4.866    | .027  |
| Fatal disease | Original positive          | 70.9%                     | 29.1%                      | 55.038   | <.001 |
|               | Congruent decoy positive   | 82.5%                     | 17.5%                      | 140.810  | <.001 |
|               | Incongruent decoy positive | 55.5%                     | 44.5%                      | 3.086    | .079  |
|               | Original negative          | 34.2%                     | 65.8%                      | 31.455   | <.001 |
|               | Congruent decoy negative   | 28.0%                     | 72.0%                      | 50.917   | <.001 |
|               | Incongruent decoy negative | 48.4%                     | 51.6%                      | 0.312    | .576  |
| Pregnancy     | Original positive          | 75.3%                     | 24.7%                      | 80.651   | <.001 |
|               | Congruent decoy positive   | 75.5%                     | 24.5%                      | 78.290   | <.001 |
|               | Incongruent decoy positive | 59.7%                     | 40.3%                      | 10.049   | .002  |

|             |                            |       |       |         |       |
|-------------|----------------------------|-------|-------|---------|-------|
| Money       | Original negative          | 20.9% | 79.1% | 106.698 | <.001 |
|             | Congruent decoy negative   | 22.6% | 77.4% | 81.983  | <.001 |
|             | Incongruent decoy negative | 43.5% | 56.5% | 4.952   | .026  |
|             | Original positive          | 73.8% | 26.3% | 71.974  | <.001 |
|             | Congruent decoy positive   | 83.6% | 16.4% | 136.830 | <.001 |
|             | Incongruent decoy positive | 61.4% | 38.6% | 14.504  | <.001 |
|             | Original negative          | 28.8% | 71.3% | 57.619  | <.001 |
|             | Congruent decoy negative   | 22.0% | 78.0% | 88.122  | <.001 |
|             | Incongruent decoy negative | 52.0% | 48.0% | 0.485   | .486  |
| Cab         | Original positive          | 68.0% | 32.0% | 39.528  | <.001 |
|             | Congruent decoy positive   | 77.9% | 22.1% | 95.589  | <.001 |
|             | Incongruent decoy positive | 48.2% | 51.8% | 0.364   | .550  |
|             | Original negative          | 22.9% | 77.1% | 89.598  | <.001 |
|             | Congruent decoy negative   | 28.9% | 71.1% | 47.905  | <.001 |
|             | Incongruent decoy negative | 55.3% | 44.7% | 3.360   | .067  |
| Homeselling | Original positive          | 63.4% | 36.6% | 21.906  | <.001 |
|             | Congruent decoy positive   | 81.4% | 18.6% | 122.653 | <.001 |
|             | Incongruent decoy positive | 46.9% | 53.1% | 1.111   | .291  |
|             | Original negative          | 30.1% | 69.9% | 48.313  | <.001 |

|                            |       |       |        |       |
|----------------------------|-------|-------|--------|-------|
| Congruent decoy negative   | 20.1% | 79.9% | 99.056 | <.001 |
| Incongruent decoy negative | 43.3% | 56.7% | 5.369  | .020  |

---

Figure S1. Frequency of choice of the decoy option.

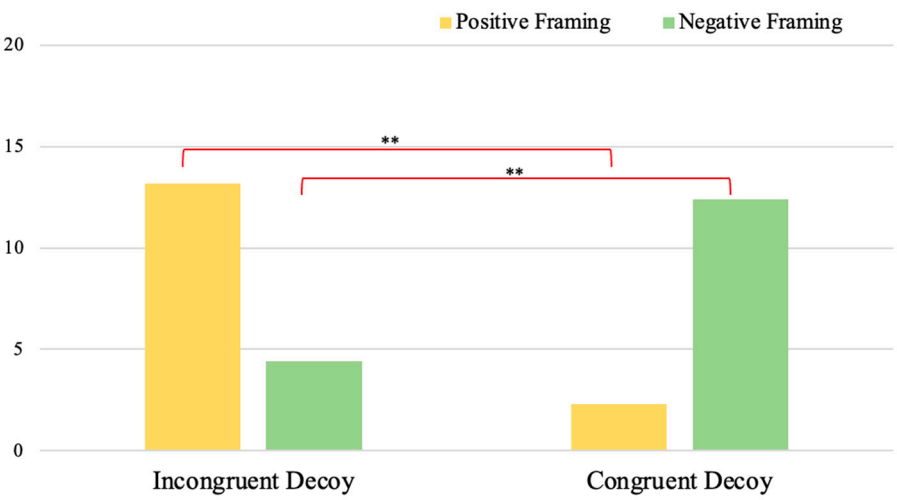

**Note.** \*\*  $p < .001$ . Only the significant comparisons that have been discussed in the Results section of the manuscript are represented.
